# Supplementary material for: Thermal properties, crystal structures, and phase diagrams of ionic plastic crystals and ionic liquids containing a chiral cationic sandwich complex
Source: Royal Society of Chemistry journal article supplement (doi:10.1039/d0cp04870d), 2020-01-01
Supplement: d0cp04870d1.pdf [file d0cp04870d1.pdf]

## Supporting Information

### Thermal Properties, Crystal Structures, and Phase Diagrams of Ionic Plastic Crystals and Ionic Liquids Containing a Chiral Cationic Sandwich Complex

Tomoyuki Mochida,<sup>\*a,b</sup> Ryo Sumitani<sup>a</sup>, and Tomoaki Yamazoe<sup>a</sup>

<sup>a</sup>*Department of Chemistry, Graduate School of Science, Kobe University, 1-1 Rokkodai, Nada, Kobe, Hyogo 657-8501, Japan*

*E-mail: tmochida@platinum.kobe-u.ac.jp*

<sup>b</sup>*Center for Membrane Technology, Kobe University, 1-1 Rokkodai, Nada, Kobe, Hyogo 657-8501, Japan*

#### Content

**Fig. S1.** DSC traces of [1]CPFSA (100% ee, 50% ee, and 0% ee).

**Fig. S2.** DSC traces of [1]CB<sub>11</sub>H<sub>12</sub> (100% ee, 51% ee, and 0% ee).

**Fig. S3.** PXRD patterns of (a) (*S*)- and (b) *rac*-[1]CB<sub>11</sub>H<sub>12</sub> at 20 and 80 °C (MoK $\alpha$  radiation).

**Fig. S4.** PXRD patterns: (a) (*S*)-[1]CF<sub>3</sub>BF<sub>3</sub> (20 °C) and *rac*-[1]CF<sub>3</sub>BF<sub>3</sub> (0, 10 °C). (b) (*S*)-[1]PF<sub>6</sub> (20 °C), *rac*-[1]PF<sub>6</sub> (20 °C), and (*S*)-[1]PF<sub>6</sub> (simulated, MoK $\alpha$  radiation).

**Fig. S5.** <sup>1</sup>H NMR spectrum of (*S*)-[1]PF<sub>6</sub> (400 MHz, Solvent: CDCl<sub>3</sub>).

**Table S1.** Crystallographic parameters.

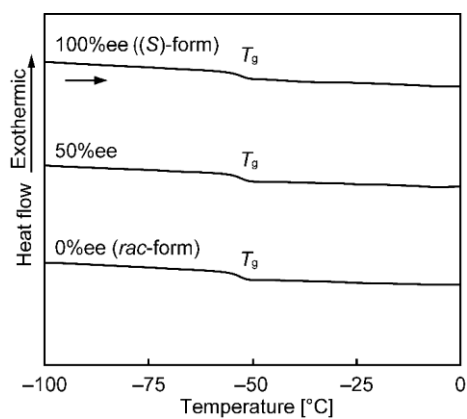

**Fig. S1.** DSC traces of [1]CPFSA (100% ee, 50% ee, and 0% ee).

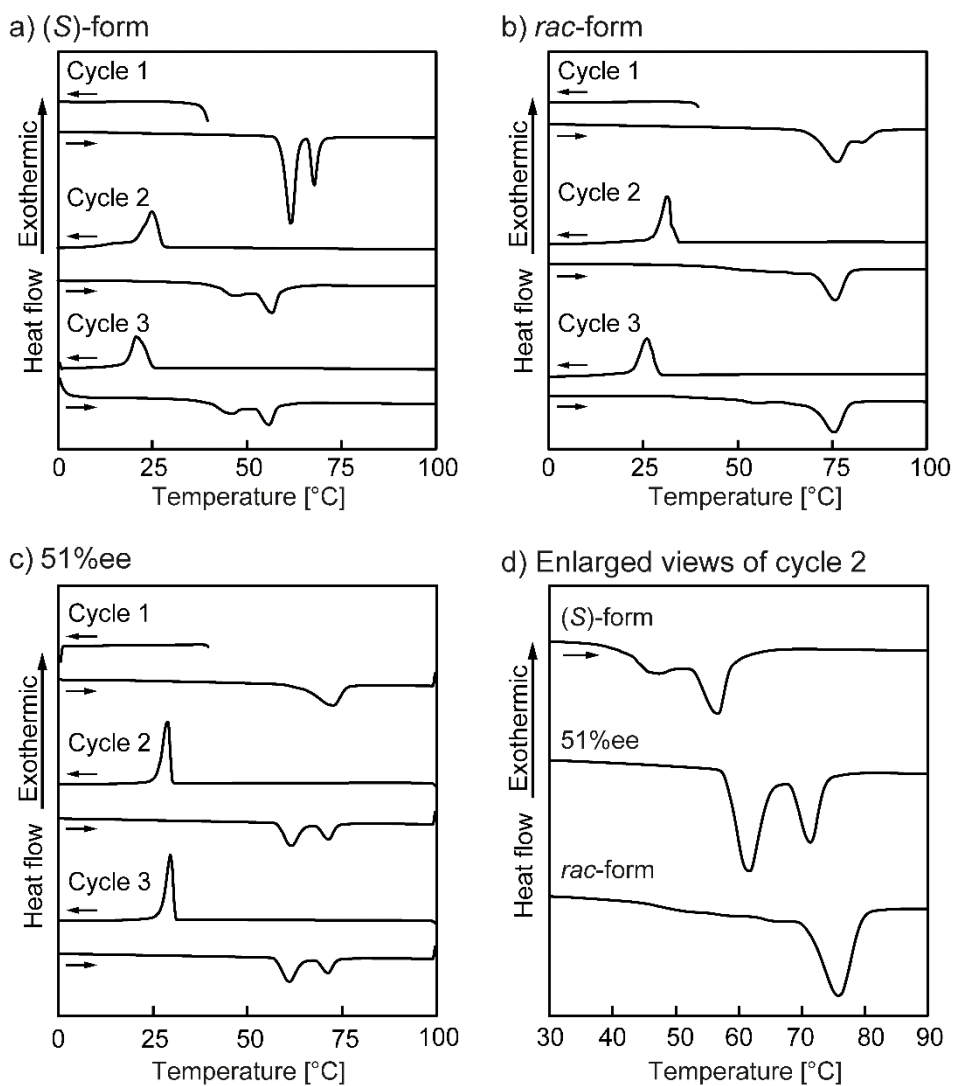

**Fig. S2.** DSC traces of [1]CB<sub>11</sub>H<sub>12</sub> (100% ee, 51% ee, and 0% ee).

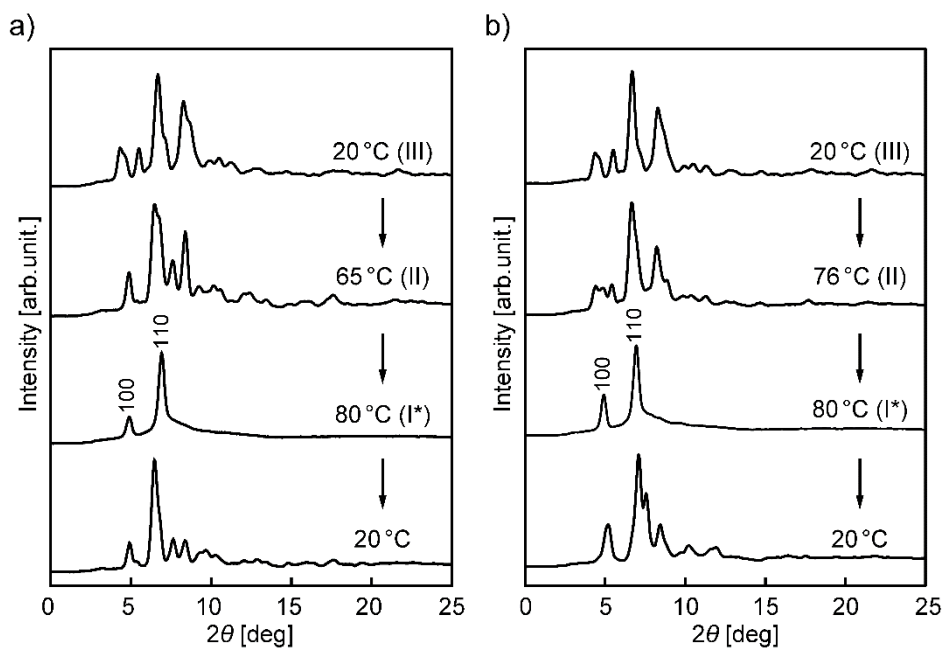

**Fig. S3.** PXRD patterns of (a) (*S*)- and (b) *rac*-[1]CB<sub>11</sub>H<sub>12</sub> at 20 and 80 °C (MoK $\alpha$  radiation).

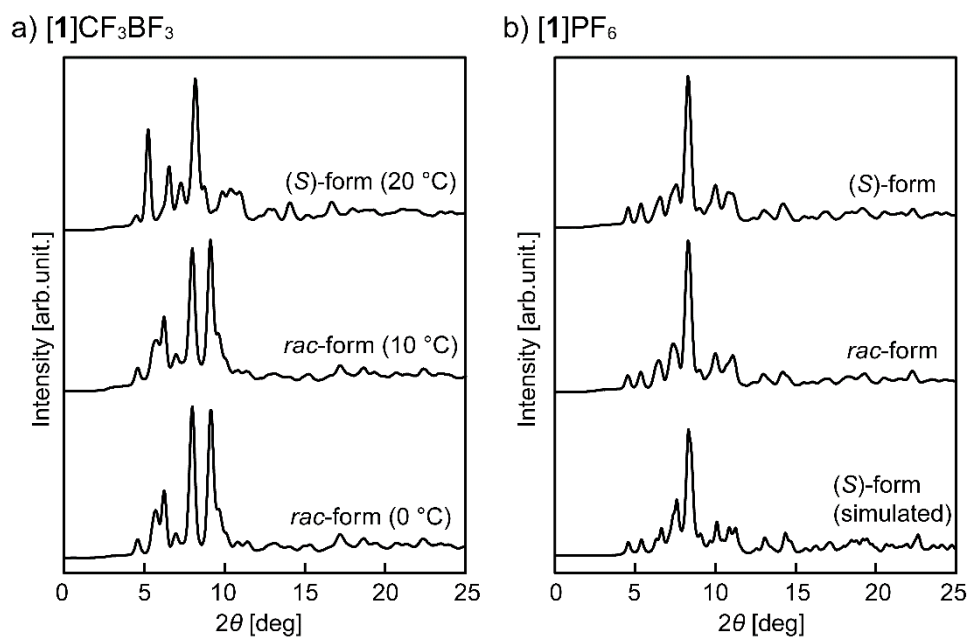

**Fig. S4.** PXRD patterns: (a) (*S*)-[1]CF<sub>3</sub>BF<sub>3</sub> (20 °C) and *rac*-[1]CF<sub>3</sub>BF<sub>3</sub> (10, 0 °C). (b) (*S*)-[1]PF<sub>6</sub> (20 °C), *rac*-[1]PF<sub>6</sub> (20 °C), and (*S*)-[1]PF<sub>6</sub> (simulated, MoK $\alpha$  radiation).

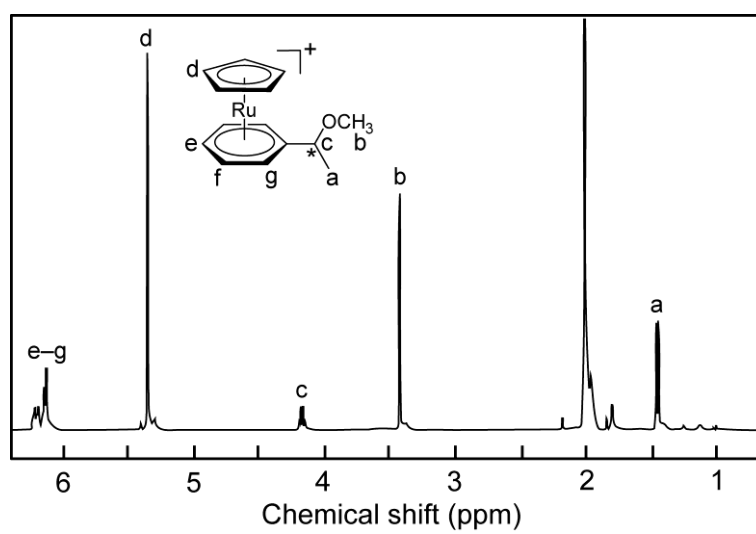

**Fig. S5.** <sup>1</sup>H NMR spectrum of (S)-[1]PF<sub>6</sub> (400 MHz, Solvent: CDCl<sub>3</sub>).

**Table S1.** Crystallographic parameters of *S*-[**1**]PF<sub>6</sub> and *rac*-[**1**]CB<sub>11</sub>H<sub>12</sub>.

|                                                                                                                 | <i>S</i> -[ <b>1</b> ]PF <sub>6</sub>                 | <i>rac</i> - $\alpha$ -[ <b>1</b> ]CB <sub>11</sub> H <sub>12</sub> | <i>rac</i> - $\beta$ -[ <b>1</b> ]CB <sub>11</sub> H <sub>12</sub> |
|-----------------------------------------------------------------------------------------------------------------|-------------------------------------------------------|---------------------------------------------------------------------|--------------------------------------------------------------------|
| Empirical formula                                                                                               | C <sub>14</sub> H <sub>17</sub> F <sub>6</sub> OPRu   | C <sub>15</sub> H <sub>29</sub> B <sub>11</sub> ORu                 | C <sub>15</sub> H <sub>29</sub> B <sub>11</sub> ORu                |
| Formula weight                                                                                                  | 447.31                                                | 445.36                                                              | 445.36                                                             |
| Crystal system                                                                                                  | Orthorhombic                                          | monoclinic                                                          | triclinic                                                          |
| Space group                                                                                                     | <i>P</i> 2 <sub>1</sub> 2 <sub>1</sub> 2 <sub>1</sub> | <i>P</i> 2 <sub>1</sub> / <i>c</i>                                  | <i>P</i> -1                                                        |
| <i>a</i> [Å]                                                                                                    | 9.5873(6)                                             | 9.590(2)                                                            | 8.7042(10)                                                         |
| <i>b</i> [Å]                                                                                                    | 12.2766(8)                                            | 22.809(5)                                                           | 10.1448(12)                                                        |
| <i>c</i> [Å]                                                                                                    | 12.9471(8)                                            | 9.636(2)                                                            | 12.0722(14)                                                        |
| $\alpha$ [°]                                                                                                    | 90                                                    | 90                                                                  | 99.0460(10)                                                        |
| $\beta$ [°]                                                                                                     | 90                                                    | 94.756(3)                                                           | 95.8930(10)                                                        |
| $\gamma$ [°]                                                                                                    | 90                                                    | 90                                                                  | 96.4770(10)                                                        |
| <i>V</i> [Å <sup>3</sup> ]                                                                                      | 1523.87(17)                                           | 2100.5(9)                                                           | 1038.1(2)                                                          |
| <i>Z</i>                                                                                                        | 4                                                     | 4                                                                   | 2                                                                  |
| $\rho_{\text{calcd}}$ [g cm <sup>-3</sup> ]                                                                     | 1.950                                                 | 1.408                                                               | 1.425                                                              |
| <i>F</i> (000)                                                                                                  | 888                                                   | 904                                                                 | 452                                                                |
| Temperature [K]                                                                                                 | 90                                                    | 90                                                                  | 90                                                                 |
| Reflns collected                                                                                                | 8801                                                  | 11884                                                               | 5300                                                               |
| Independent reflns                                                                                              | 3494                                                  | 4862                                                                | 3865                                                               |
| Parameters                                                                                                      | 210                                                   | 285                                                                 | 259                                                                |
| <i>R</i> <sub>int</sub>                                                                                         | 0.0197                                                | 0.0514                                                              | 0.0157                                                             |
| <i>R</i> <sub>1</sub> <sup><i>a</i></sup> , <i>R</i> <sub>w</sub> <sup><i>b</i></sup> ( <i>I</i> > 2 $\sigma$ ) | 0.0144, 0.0364                                        | 0.0527, 0.0963                                                      | 0.0201, 0.0532                                                     |
| <i>R</i> <sub>1</sub> <sup><i>a</i></sup> , <i>R</i> <sub>w</sub> <sup><i>b</i></sup> (all data)                | 0.0145, 0.0364                                        | 0.0852, 0.1059                                                      | 0.0203, 0.0533                                                     |
| Goodness of fit                                                                                                 | 1.147                                                 | 1.102                                                               | 1.089                                                              |
| $\Delta\rho_{\text{max,min}}$ [e Å <sup>-3</sup> ]                                                              | 0.301, -0.785                                         | 1.090, -1.354                                                       | 0.330, -0.557                                                      |
| Flack parameter                                                                                                 | 0.037                                                 | –                                                                   | –                                                                  |

$${}^a R_1 = \sum ||F_o| - |F_c|| / \sum |F_o|. \quad {}^b R_w = [\sum w (F_o^2 - F_c^2)^2 / \sum w (F_o^2)^2]^{1/2}$$
